# Supplementary material for: PIK3CA Mutations Contribute to Acquired Cetuximab Resistance in Patients with Metastatic Colorectal Cancer
Source: Oxford University Press journal article supplement (doi:10.1158/1078-0432.ccr-16-2738), 2017-04-19
Supplement: 10780432ccr162738-sup-173949_3_supp_3926965_wn7wmd.xlsx [file 10780432ccr162738-sup-173949_3_supp_3926965_wn7wmd.xlsx]

## Sheet: Table S9
Supplementary Table 2. Potential effects on protein function of candidate mutations identified in cfDNA, as predicted using PolyPhen-2 and SIFT.
Gene	Amino acid change	PolyPhen-2			SIFT		Curation in COSMIC Database
		Prediction	pph2_prob		Prediction	Score
AKT1	p.W22G	probably damaging		1	DAMAGING	0	Yes
BRAF	p.V600E	probably damaging		0.971	DAMAGING	0.01	Yes
BRAF	p.M620K	probably damaging		0.999	DAMAGING	0	No
BRAF	p.H585R	possibly damaging		0.877	DAMAGING	0.05	No
EGFR	p.G459E	probably damaging		1	DAMAGING	0	No
EGFR	p.K489R	benign		0.023	TOLERANT	0.6	No
EGFR	p.S447F	probably damaging		0.999	TOLERANT	0.25	No
KRAS	p.N85D	benign		0.005	DAMAGING	0.03	No
KRAS	p.G12D	possibly damaging		0.517	DAMAGING	0	Yes
KRAS	p.G13D	possibly damaging		0.803	DAMAGING	0.03	Yes
KRAS	p.G12V	probably damaging		0.999	DAMAGING	0	Yes
KRAS	p.K104N	probably damaging		1	DAMAGING	0	No
KRAS	p.K5N	probably damaging		1	DAMAGING	0	Yes
KRAS	p.V29A	probably damaging		0.995	DAMAGING	0.02	No
KRAS	p.Q131R	benign		0.001	TOLERANT	0.55	No
KRAS	p.T148A	benign		0.002	TOLERANT	0.51	No
KRAS	p.Q61H	benign		0.09	DAMAGING	0	Yes
NRAS	p.A66T	benign		0.095	DAMAGING	0.02	No
NRAS	p.Q150R	benign		0	TOLERANT	0.28	No
NRAS	p.T74I	probably damaging		0.998	TOLERANT	0.06	No
PIK3CA	p.K966E	possibly damaging		0.858	DAMAGING	0.03	No
PIK3CA	p.K944N	probably damaging		1	DAMAGING	0	No
PIK3CA	p.V955G	probably damaging		1	DAMAGING	0	No
PIK3CA	p.F930S	probably damaging		1	DAMAGING	0	No
PIK3CA	p.C971S	benign		0.001	TOLERANT	0.72	No
PIK3CA	p.E978V	benign		0.364	TOLERANT	0.08	No
PIK3CA	p.V955I	probably damaging		0.993	TOLERANT	0.35	No
PTEN	p.M239T	benign		0.425	DAMAGING	0.02	No
PTEN	p.M134L	possibly damaging		0.927	DAMAGING	0	Yes
PTEN	p.N117D	benign		0	TOLERANT	0.63	No
PTEN	p.E150K	benign		0.4	TOLERANT	0.07	No
PTEN	p.E157K	benign		0.238	TOLERANT	0.41	No
PTEN	p.G143A	possibly damaging		0.716	TOLERANT	0.15	No
PTEN	p.F243S	possibly damaging		0.784	TOLERANT	0.28	Yes
PTEN	p.V222A	probably damaging		0.999	TOLERANT	0.77	Yes
PTEN	p.K144N	probably damaging		0.968	TOLERANT	0.31	No
PTEN	p.Q149R	probably damaging		0.979	TOLERANT	0.4	Yes
PTEN	p.Q245*						Yes
TP53	p.E198D	probably damaging		0.994	DAMAGING	0.01	No
Among the 39 mutations, 19 were predicted to be "damaging", including 17 nonsynonymous mutations selected by both PolyPhen-2 and SIFT, one stop-gain mutation and one known "hot spot" mutation at KRAS p.Q61H. *, Stop-gain mutation.
