# Supplementary material for: PIK3CA Mutations Contribute to Acquired Cetuximab Resistance in Patients with Metastatic Colorectal Cancer
Source: Oxford University Press journal article supplement (doi:10.1158/1078-0432.ccr-16-2738), 2017-04-19
Supplement: 10780432ccr162738-sup-173949_3_unknown_upload_3926967_tn9jtj.xlsx [file 10780432ccr162738-sup-173949_3_unknown_upload_3926967_tn9jtj.xlsx]

## Sheet: Table S3
Supplementary Table 3. Dynamics of mutations related to acquired resistance in plasma samples of development cohort
Case no.	Total number of plasma samples	Gene	Transcript Accession	Exon	Nucleotide (genomic)	Nucleotide (cDNA)	Amino acid (protein)	Baseline	week4	week8		week12		week16		week20		week24		week28		week32		week36		week40		week44		week48		week52		week54
								AFa (%)	AF (%)	AF (%)	p-value	AF (%)	p-value	AF (%)	p-value	AF (%)	p-value	AF (%)	p-value	AF (%)	p-value	AF (%)	p-value	AF (%)	p-value	AF (%)	p-value	AF (%)	p-value	AF (%)	p-value	AF (%)	p-value	AF (%)	p-value
1	9	NMDb
2	7	KRAS	NM_004985	3	Chr12:25380275 T>G	c.183T>G	p.Q61H	－c	－	0.73	3.7e-06	－		3	<1.00E-10	2.37	<1.00E-10	7.73	<1.00E-10
3	4	NMD
4	5	NMD
5	6	NMD
6	9	PIK3CA	NM_006218	19	Chr3:178948060 A>T	c.2832A>T	p.K944N	NAd	NA	－		－		－		0.34	0.02	－		－		－		－		1.07	0.0005
7	5	PIK3CA	NM_006218	19	Chr3:178948091 G>A	c.2863G>A	p.V955I	－	NA	NA		NA		NA		NA		NA		NA		NA		－		0.11	0.496	－		1.21	<1.00E-10
8	3	NMD
9	4	NMD
10	5	NMD
11	5	NMD
12	10	KRAS	NM_004985	2	Chr12:25398281 C>T	c.38C>T	p.G13D	－	－	－		－		－		－		－		1.19	0.043	1.14	0.07	16.14	<1.00E-10
		KRAS	NM_004985	2	Chr12:25398284 C>T	c.35C>T	p.G12D	－	－	－		－		4.11	<1.00E-10	－		－		－		4.5	<1.00E-10	17.87	<1.00E-10
		EGFR	NM_005228	12	Chr7:55227909 G>A	c.1376G>A	p.G459E	－	－	－		－		－		－		－		－		－		1.24	0.032
13	11	KRAS	NM_004985	2	Chr12:25398281 C>T	c.38C>T	p.G13D	－	－	－		－		－		－		－		－		－		1.53	0.0024	2.31e	<1.00E-10
		KRAS	NM_004985	2	Chr12:25398284 C>T	c.35C>T	p.G12D	－	－	－		－		－		－		－		－		－		1.46	0.004	2.29e	<1.00E-10
14	10	BRAF	NM_004333	15	Chr7:140453136 A>T	c.1799T>A	p.V600E	－	NA	－		－		－		－		－		－		NA		－		－		4.2	<1.00E-10
15	6	NMD						－
16	5	PIK3CA	NM_006218	19	Chr3:178948060 A>T	c.2832A>T	p.K944N	－	NA	－		－		0.62	0.008	1.52	0.0001
17	6	PIK3CA	NM_006218	19	Chr3:178948060 A>T	c.2832A>T	p.K944N	－	－	0.87	0.27	0.81	0.037	NA		0.61	0.19	1.12	0.0081
18	6	NMD
19	11	KRAS	NM_004985	2	Chr12:25398281 C>T	c.38C>T	p.G13D	－	NA	NA		NA		－		－		－		－		－		－		NA		－		－		1.53	0.00011	2.92	<1.00E-10
		KRAS	NM_004985	2	Chr12:25398284 C>T	c.35C>T	p.G12D	－	NA	NA		NA		－		0.06	0.156	－		－		－		－		NA		－		－		1.58	6.1e-05	3.87	<1.00E-10
20	6	PTEN	NM_000314	7	Chr10:89717708 C>T	c.733C>T	p.Q245*	－	－	－		0.04	0.84	0.18	0.44	1.15e	1e-06
21	2	PIK3CA	NM_006218	19	Chr3:178948017 T>C	c.2789T>C	p.F930S	0.04				2.11	<1.00E-10
		KRAS	NM_004985	4	Chr12:25378686 C>A	c.312C>A	p.K104N	0.12				1.34	<1.00E-10
22	3	AKT1	NM_001014431	3	Chr14;105246536 A>C	c.64A>G	p.W22G	0.24		－		1.5	<1.00E-10
		PIK3CA	NM_006218	19	Chr3:178948092 T>G	c.2864T>G	p.V955G	0.21		－		1.46	<1.00E-10
23	2	KRAS	NM_004985	2	Chr12:25398233 A>G	c.86A>G	p.V29A	－				1.65	<1.00E-10
		BRAF	NM_004333	15	Chr7:140453076 A>T	c.1859A>T	p.M620K	0.12				1.04	6.8e-06
24	3	NMD
27	2	PIK3CA	NM_006218	19	Chr3:178948124 A>G	c.2896A>G	p.K966E	0.18												1.72	<1.00E-10
		TP53	NM_000546	5	Chr17:7578255 T>A	c.594T>A	p.E198D	0.06												1.57	<1.00E-10
28	2	KRAS	NM_004985	2	Chr12:25398304 T>G	c.15T>G	p.K5N	－														1.19	<1.00E-10
29	3	PTEN	NM_000314	5	Chr10:89692916 A>T	c.400A>T	p.M134L	0.03						－																				1.15	<1.00E-10
30	3	NMD
33	2	BRAF	NM_004333	15	Chr7:140453181 T>C	c.1754T>C	p.H585R	0.06						1.13	<1.00E-10
34	2	KRAS	NM_004985	2	Chr12:25398284 C>A	c.35C>A	p.G12V	0.03						3.78	<1.00E-10
35	3	NMD
37	3	NMD
39	1	NMD
40	1	NMD
41	2	NMD
42	1	NMD
43	1	NMD
44	2	NMD
45	1	NMD
46	2	NMD
47	2	NMD
48	1	NMD
49	3	NMD
50	1	NMD
51	1	NMD
52	1	NMD
53	1	NMD
a AF: mutant allele fraction
b NMD: no mutation detected
c －: Mutant allele under the detectable level
d NA:plasma sample not available
e: Last plasma sample collected. Patient didn’t reach disease progression.
* : Stop-gain mutation
