# Supplementary material for: PIK3CA Mutations Contribute to Acquired Cetuximab Resistance in Patients with Metastatic Colorectal Cancer
Source: Oxford University Press journal article supplement (doi:10.1158/1078-0432.ccr-16-2738), 2017-04-19
Supplement: 10780432ccr162738-sup-173949_3_unknown_upload_3926973_fn9jdf.xlsx [file 10780432ccr162738-sup-173949_3_unknown_upload_3926973_fn9jdf.xlsx]

## Sheet: Table S1
Supplementary Table 1. Clinical information of development cohort
Case no.	Gender	Age (year)	ECOG	Primary tumor location	Surgery	Residue of primary tumora	Time from diagnosis of CRC to metastatic disease(m)	Tumor burden (cm) b	Number of lesions detectable by CT	Line of prior therapy	Prior treatment regimens	Regimen	Best responsec	PFSd (w)	OSe(w)	Time to presence of acquired resistant mutations (w)	Time from presence of acquired resistant mutations to PD (w)	Resistance
1	M	46	0	Rectum	Radical resection	N	35.1	5.8	7	3	FOLFOX, FOLFIRI, Capecitabine, Bev	Cet	PR	54	67	NMDf	－g	Acquired
2	M	59	1	Distal colon	Radical resection	N	24.9	17.4	68	2	FOLFOX, FOLFIRI, Bev	Cet	PR	22	43	7.42857	14.7143	Acquired
3	F	59	2	Transverse colon	Radical resection	Y	4.9	0	0	3	FOLFOX, FOLFIRI, Raltitrexed	Cet	SD	12	14	NMD	－	Acquired
4	M	40	0	Proximal colon	Radical resection	N	3	8.9	2	2	FOLFOX, FOLFIRI	Cet	SD	14	48	NMD	－	Acquired
5	M	56	0	Proximal colon	Palliative resection	N	0	19.9	7	2	FOLFOX, FOLFIRI	Cet	SD	30	74	NMD	－	Acquired
6	M	44	1	Rectum	Radical resection	N	6.9	7.2	10	2	FOLFOX, FOLFIRI	Cet	SD	38	66	19.8571	18.1429	Acquired
7	F	42	0	Rectum	Radical resection	N	57.3	7.2	8	2	FOLFOX, FOLFIRI	Cet	SD	46	90	39.8571	6	Acquired
8	M	43	1	Distal colon	Palliative resection	Y	0	0	3	3	FOLFOX, FOLFIRI, Capecitabine	Cet	SD	12	19	NMD	－	Acquired
9	F	67	1	Distal colon	Palliative resection	N	0	4.1	5	1	FOLFOX	Cet+Chemo	PR	48	178	NMD	－	Acquired
10	M	46	1	Distal colon	Radical resection	N	2.4	58.1	19	3	FOLFOX, FOLFIRI, Raltitrexed, Bev	Cet+Chemo	PR	22	35	NMD	－	Acquired
11	F	48	0	Rectum	None	Y	0	34.1	7	0	None	Cet+Chemo	PR	20	59	NMD	－	Acquired
12	F	50	0	Rectum	Radical resection	N	3.6	20.6	19	2	FOLFOX, FOLFIRI, Bev	Cet	PR	29	53	17	12.4286	Acquired
13	F	55	1	Distal colon	Palliative resection	N	0	6.6	3	2	FOLFOX, Capecitabine	Cet	PR	59	59	34	25.2857	Acquired
14	F	72	1	Proximal colon	Radical resection	N	7.4	15.7	7	1	FOLFOX	Cet	SD	46	68	46	0	Acquired
15	M	35	1	Rectum	Radical resection	N	10.5	17.6	4	1	FOLFOX, Bev	Cet+Chemo	SD	58	58	NMD	－	Acquired
16	M	63	1	Distal colon	Radical resection	N	4.4	3.7	2	1	FOLFOX	Cet+Chemo	SD	18	42	13.7143	4.14286	Acquired
17	F	66	1	Proximal colon	Radical resection	N	5.1	1.7	2	1	FOLFOX	Cet+Chemo	PR	22	42	7	15.1429	Acquired
18	F	61	1	Distal colon	Palliative resection	N	0	12.9	1	0	None	Cet+Chemo	PR	50	50	NMD	－	Acquired
19	F	69	1	Proximal colon	Palliative resection	N	0.1	23.8	50	3	FOLFOX, FOLFIRI, Capecitabine	Cet+Chemo	PR	53	76	17.5714	35.1429	Acquired
20	M	60	1	Distal colon	None	Y	0	0	0	0	None	Cet+Chemo	PR	41	41	14.1429	26.5714	Acquired
21	F	55	1	Rectum	Radical resection	Y	9.3	12.3	18	2	FOLFOX, FOLFIRI	Cet	SD	13	38	NAh	－	Acquired
22	M	41	1	Distal colon	Radical resection	Y	58.6	1.2	7	2	FOLFOX, FOLFIRI	Cet	SD	14	38	NA	－	Acquired
23	F	27	0	Proximal colon	Radical resection	N	41.5	2.8	2	3	FOLFOX, FOLFIRI, Capecitabine	Cet	SD	13	75	NA	－	Acquired
24	M	62	1	Rectum	Radical resection	N	31.4	20.9	5	3	FOLFOX, FOLFIRI, Capecitabine, Bev	Cet	PR	55	81	NA	－	Acquired
25	F	58	0	Distal colon	Radical resection	N	27.3	1.9	9	3	FOLFOX, FOLFIRI, Capecitabine	Cet	SD	55	75	NA	－	Acquired
26	F	75	2	Distal colon	Radical resection	N	10.3	7.4	12	2	FOLFOX, FOLFIRI	Cet	SD	12	44	NA	－	Acquired
27	M	47	1	Distal colon	Radical resection	N	0.4	32.4	19	3	FOLFOX, FOLFIRI, Capecitabine, Bev	Cet	SD	30	49	NA	－	Acquired
28	M	48	1	Rectum	Palliative resection	N	0	6.9	10	0	None	Cet+Chemo	PR	32	85	NA	－	Acquired
29	M	65	1	Distal colon	Palliative resection	N	0	8.2	20	0	None	Cet+Chemo	PR	57	87	NA	－	Acquired
30	M	63	1	Distal colon	Palliative resection	N	0	3	4	0	None	Cet+Chemo	PR	67	149	NA	－	Acquired
31	F	21	1	Rectum	None	N	0	8.3	3	0	None	Cet+Chemo	PR	117	117	NA	－	Acquired
32	M	35	1	Distal colon	None	Y	0	14.1	33	0	None	Cet+Chemo	PR	25	26	NA	－	Acquired
33	M	57	1	Rectum	None	Y	0	5.8	1	0	None	Cet+Chemo	SD	16	64	NA	－	Acquired
34	M	56	2	Proximal colon	None	Y	0	36.9	25	2	FOLFOX, FOLFIRI	Cet+Chemo	SD	14	30	NA	－	Acquired
35	F	41	1	Rectum	None	Y	0	43.5	60	0	None	Cet+Chemo	SD	12	31	NA	－	Acquired
36	M	36	0	Whole colon	Radical resection	Y	15.8	37	50	5	FOLFOX, FOLFIRI, Capecitabine, Hydroxycamptothecin, Pirarubicin	Cet	SD	13	23	NA	－	Acquired
37	F	62	2	Proximal colon	None	Y	0	25.8	15	1	FOLFOX	Cet+Chemo	SD	12	49	NA	－	Acquired
38	F	42	2	Distal colon	Palliative resection	Y	0	142.8	50	0	None	Cet+Chemo	SD	14	37	NA	－	Acquired
39	M	64	0	Distal colon	Radical resection	N	1.7	36.6	55	4	FOLFOX, FOLFIRI, Capecitabine,Tegafur Gimeracil Otera, Bev	Cet	PD	4	14	NA	－	Primary
40	M	65	0	Rectum	None	Y	0	10.8	67	2	FOLFOX, FOLFIRI	Cet	PD	4	9	NA	－	Primary
41	M	50	0	Distal colon	Palliative resection	Y	0	18.1	33	2	FOLFOX, FOLFIRI, Bev	Cet	PD	6	40	NA	－	Primary
42	F	72	1	Rectum	None	Y	0	37.2	20	0	None	Cet	PD	4	9	NA	－	Primary
43	F	30	1	Rectum	None	Y	0	48.7	6	0	None	Cet+Chemo	PD	6	65	NA	－	Primary
44	F	49	2	Proximal colon	Palliative resection	Y	0	13.3	5	1	FOLFOX, Bev	Cet	PD	4	12	NA	－	Primary
45	F	60	1	Rectum	Radical resection	N	9.1	8	59	2	FOLFOX, FOLFIRI	Cet	PD	6	33	NA	－	Primary
46	F	33	1	Proximal colon	Palliative resection	N	0	7	14	2	FOLFOX, FOLFIRI	Cet	PD	6	25	NA	－	Primary
47	F	66	1	Proximal colon	Palliative resection	N	0	11.4	4	2	FOLFOX, FOLFIRI	Cet	PD	6	46	NA	－	Primary
48	M	57	2	Proximal colon	Palliative resection	Y	0	0	1	3	FOLFOX, FOLFIRI, Capecitabine, Bev	Cet	PD	6	17	NA	－	Primary
49	F	54	1	Rectum	Radical resection	Y	28.8	0	13	3	FOLFOX, FOLFIRI, Capecitabine	Cet	PD	6	6	NA	－	Primary
50	M	73	1	Distal colon	Radical resection	N	24.4	2.6	10	2	FOLFOX, FOLFIRI	Cet	PD	6	14	NA	－	Primary
51	M	42	1	sigmoid colon	Palliative resection	Y	0	13.9	3	2	FOLFOX, Capecitabine	Cet	PD	6.42857	10	NA	－	Primary
52	F	50	1	rectum	Radical resection	N	13.3	9.2	4	1	FOLFOX	Cet+Chemo	PD	6.14286	20.4286	NA	－	Primary
53	F	51	1	colon	Palliative resection	Y	0	21.3	7	1	FOLFOX, Bev	Cet+Chemo	PD	5.71429	14.4286	NA	－	Primary
a Residue of primary tumor: Y, yes; N, no.
b Tumor burden: Aggregate cross-sectional diameter of the index lesions
c Best response: According to the RECIST criteria, PR, partial response; SD, stable disease; PD, progression disease.
d PFS: Progression free survival.
e OS: Overall survival
f NMD: no mutation genes detected
g－: not applicable for calculation of time duration
h NA: not applicable for time duration analyses due to absence of longitudinal plasma samples.
ECOG, Eastern Cooperative Oncology Group
CRC, Colorectal Cancer
Cet, cetuximab; Bev, Bevacizumab; FOLFOX, Oxaliplatin plus 5-fluorouracil and leucovorin; FOLFIRI, Irinotecan plus 5-fluorouracil and leucovorin
Chemo, chemotherapy
